1           **Differences in IgG antibody responses following BNT162b2 and**  
2           **mRNA-1273 Vaccines**

3  
4 José G. Montoya MD<sup>1</sup>, Amy E. Adams MD, PhD<sup>2</sup>, Valérie Bonetti BA<sup>1</sup>, Sien Deng PhD<sup>3</sup>,  
5 Nan A. Link MD<sup>2</sup>, Suzanne Pertsch MD<sup>2</sup>, Kjerstie Olson BS<sup>1</sup>, Martina Li MPH<sup>3</sup>, Ellis C.  
6 Dillon PhD<sup>3</sup>, Dominick L. Frosch PhD<sup>3</sup>.

7  
8 <sup>1</sup>Dr. Jack S. Remington Laboratory for Specialty Diagnostics and Palo Alto Medical  
9 Foundation Research Institute

10 <sup>2</sup>Palo Alto Foundation Medical Group

11 <sup>3</sup>Center for Health Systems Research, Sutter Health, Palo Alto Medical Foundation  
12 Research Institute

13 Palo Alto, CA, 94301

14  
15 **Corresponding Author:** José G. Montoya M.D., FACP, FIDSA

16 Dr. Jack S. Remington Laboratory for Specialty Diagnostics

17 National Reference Laboratory for the Study and Diagnosis of Toxoplasmosis and  
18 special pathogens.

19 Palo Alto Medical Foundation

20 795 El Camino Real

21 Ames Building

22 Palo Alto, CA, USA

23 E-mail: [montoyj@sutterhealth.org](mailto:montoyj@sutterhealth.org)

24  
25 **Running Title:** IgG-specific responses to SARS-CoV-2 mRNA vaccines

26  
27  
28 **Key words:** COVID-19, SARS-CoV-2, BNT162b2, mRNA-1273, vaccine, IgG,  
29 antibodies

30

31 **ABSTRACT**

32 Studies examining antibody responses by vaccine brand are lacking and may be  
33 informative for optimizing vaccine selection, dosage, and regimens. The purpose of this  
34 study is to assess IgG antibody responses following immunization with BNT162b2 (30  
35  $\mu$ g S protein) and mRNA-1273 (100  $\mu$ g S protein) vaccines. A cohort of clinicians at a  
36 non-for-profit organization is being assessed clinically and serologically following  
37 immunization with BNT162b2 or mRNA-1273. IgG responses were measured at the  
38 Remington Laboratory by an IgG against the SARS-CoV-2 spike protein-receptor  
39 binding domain. Mixed-effect linear (MEL) regression modeling was used to examine  
40 whether the SARS-CoV-2 IgG level differed by vaccine brand, dosage, or days since  
41 vaccination. Among 532 SARS-CoV-2 seronegative participants, 530 (99.6%)  
42 seroconverted with either vaccine. After adjustments for age and gender MEL  
43 regression modeling revealed that the average IgG increased after the second dose  
44 compared to the first dose ( $p < 0.001$ ). Overall, titers peaked at week six for both  
45 vaccines. Titers were significantly higher for mRNA-1273 vaccine on days 14-20 ( $p <$   
46  $0.05$ ), 42-48 ( $p < 0.01$ ), 70-76 ( $p < 0.05$ ), 77-83 ( $p < 0.05$ ), and higher for BNT162b2  
47 vaccine on days 28-34 ( $p < 0.001$ ). In two participants taking immunosuppressive drugs  
48 SARS-CoV-2 IgG remained negative. mRNA-1273 elicited both earlier and higher IgG  
49 antibody responses than BNT162b2, possibly due to the higher S-protein delivery.  
50 Prospective clinical and serological follow-up of defined cohorts such as this may prove  
51 useful in determining antibody protection and whether differences in antibody kinetics  
52 between the vaccines have manufacturing relevance and clinical significance.

53

54

55

56

57

58

## 59 **INTRODUCTION**

60           Within one year of the emergence of SARS-CoV-2 two novel and effective mRNA  
61 vaccines became available, BNT162b2 (Pfizer/BioNTech) and mRNA-1273 (Moderna)  
62 (1, 2). BNT162b2 is translated into 30 µg of SARS-CoV-2 full-length spike (pre-fusion  
63 conformation) and boosted three weeks after (3). mRNA-1273 is translated into 100 µg  
64 of pre-fusion-stabilized spike glycoprotein and boosted four weeks later (4).

65           Healthcare workers were the first group to receive BNT162b2 and mRNA-1273  
66 (1). The present study was launched on 12/10/20, the week that SARS-CoV-2 vaccines  
67 became available, providing the opportunity to assess antibody responses in  
68 participants receiving two different vaccine brands, before and after immunization. Most  
69 studies so far have focused on following IgG antibody responses to single vaccine  
70 brands (5-8). This study examines how antibody responses vary by vaccine brand,  
71 dosage, and days since vaccination.

## 72 **MATERIALS AND METHODS**

73           A longitudinal study was initiated to estimate the incidence of SARS-CoV-2  
74 infection and COVID-19 by serological testing. Additionally, it aims to assess SARS-  
75 CoV-2 antibody responses and sustainability following infection or immunization. Here

76 we report IgG responses following immunization within the first three months of the  
77 study. The study protocol was approved by the Sutter Health IRB.

78

79

## 80 **Serological Assay**

81 Serum SARS-CoV-2 IgG was measured by an automated method (VIDAS®  
82 SARS-COV-2 IgG, Biomérieux, France) using an enzyme-linked fluorescent assay  
83 (ELFA) at the Dr. Jack S. Remington Laboratory for Specialty Diagnostics at Sutter  
84 Health (hereafter Remington Lab, [https://www.sutterhealth.org/services/lab-](https://www.sutterhealth.org/services/lab-pathology/toxoplasma-serology-laboratory)  
85 [pathology/toxoplasma-serology-laboratory](https://www.sutterhealth.org/services/lab-pathology/toxoplasma-serology-laboratory)). VIDAS® SARS-COV-2 detects IgG against  
86 the receptor binding domain (RBD) of the spike protein. Results are reported as an  
87 index ( $\geq 1.00$  = positive). Data from the manufacturer and the Remington lab ( $n = 199$ ),  
88 revealed that this assay had a sensitivity of 100% for specimens obtained  $\geq 15$  days  
89 following onset of symptoms in COVID-19 positive patients. In 989 pre-pandemic  
90 samples from the manufacturer, only one tested positive (99.9% specificity)(9).

## 91 **Participants**

92 A total of 1,769 clinicians were invited to participate and had to sign the informed  
93 consent before enrolling via REDCap. Clinicians belong to a multi-specialty practice  
94 comprised of adult and pediatric primary care physicians, specialists (including  
95 hospitalists), and advanced practice clinicians. In addition to completing surveys,  
96 participants provide serum at baseline and every three months for a year.

## 97 **Statistical Analysis**

98 Mixed-effect linear (MEL) regression modeling was used to examine whether the  
99 SARS-CoV-2 IgG index measured over time differed by vaccine brand, dosage, or days  
100 since vaccination, and examine the interaction effect between the vaccine brand and  
101 days since vaccination for the IgG trajectory across time. Modeling adjusted for age and  
102 gender and included a subject-specific random intercept term to account for the within-  
103 person correlation of measurements over time. The restricted maximum likelihood  
104 (REML) approach was used to fit the MEL to produce unbiased estimates of standard  
105 errors. Participants who tested positive for SARS-CoV-2 PCR and/or IgG before  
106 vaccination (n = 19) were excluded from the model for this report.

## 107 **RESULTS**

108 Among 656 clinicians who consented to participate, 611 (93.1%) completed their  
109 baseline survey and serum collection. Mean age of participants was 47.4 years.  
110 Approximately two-thirds were female (Table 1). Participants self-identified as primarily  
111 white (49.8%), Asian (44%), and non-Hispanic (96.2%). Of the 611 participants, 551  
112 (90.2%) completed the three-month follow-up. Of the 551 participants, 532 (96.6%)  
113 tested negative for SARS-CoV-2 IgG at baseline and therefore were found eligible for  
114 seroconversion. Of the 532 participants, 217 (40.8%) received BNT162b2 and 315  
115 (59.2%) received mRNA-1273.

116 Seroconversion was demonstrated in 530 (99.6%) of 532 participants. Two  
117 participants did not seroconvert following their second dose. In the first non-  
118 seroconverting participant, who was receiving a monoclonal antibody (rituximab) against

119 CD20, SARS-CoV-2 antibodies were not detected 28 days following the second dose  
120 (BNT162b2) (10). In the second non-seroconverting participant, who was receiving an  
121 agent (fingolimod-phosphate) that blocks lymphocytes' ability to emerge from lymph  
122 nodes, SARS-CoV-2 antibodies were not detected 21 days following the second dose  
123 (mRNA-1273) (11).

124 Figure 1 depicts the SARS-CoV-2 antibody levels for participants who provided  
125 serum samples following vaccination. After adjustments for age and gender, MEL  
126 regression modeling found that the IgG increased significantly after the second dose of  
127 vaccine compared to the first dose ( $p < 0.001$ ). Overall, titers peaked at week six for both  
128 vaccines. Significant differences in IgG were found between vaccine brands, higher for  
129 mRNA-1273 on days 14-20 ( $p < 0.05$ ), 42-48 ( $p < 0.01$ ), 70-76 ( $p < 0.05$ ), 77-83 ( $p <$   
130  $0.05$ ), and higher for BNT162b2 on days 28-34 ( $p < 0.001$ ).

131 During the days 0-6 post-vaccination, two of 44 participants who received mRNA-  
132 1273 had detectable antibodies. In contrast, during the same period, none of the 33  
133 participants who received BNT162b2 had detectable antibodies.

## 134 **DISCUSSION**

135 We detected SARS-CoV-2 IgG seroconversion, using an assay aimed at the  
136 spike protein-RBD, in all clinicians following either vaccine, with two exceptions who  
137 were under immunosuppression. Several differences were identified in the IgG  
138 responses to BNT162b2 and mRNA-1273. IgG responses to mRNA-1273 were  
139 observed early, within six days following the first dose, while no detectable IgG  
140 responses were observed with BNT162b2. IgG responses were more robust to mRNA-

141 1273 than BNT162b2 following the second-dose. It is possible that the higher antigenic  
142 load in mRNA-1273, containing more than three-fold the amount of antigen than  
143 BNT162b2 explains the significant differences in IgG responses observed. The fact that  
144 the antibody kinetics correlated directly with days since vaccination, booster dose, and  
145 antigenic content suggests that the mRNA vaccine platforms are suitable for delivery of  
146 accurate amounts of antigen despite that it involves translation steps from RNA to  
147 protein.

148         Considering that BNT162b2 is boosted one week earlier than mRNA-1273 may  
149 explain why the differences in responses were not even wider in favor of mRNA-1273. If  
150 protection requires maintaining antibody levels above a certain threshold, higher initial  
151 levels of response following vaccination or frequent boosting may succeed in keeping  
152 antibody levels above this threshold for longer than after natural infection (12) despite  
153 similar rates of antibody decay. Moreover, even small differences in antibody titers may  
154 translate into wider divergence of protection due to amplifiable immune cascades.

155         Limitations of our paper include that we do not yet have the clinical correlates of  
156 immunity that we expect to accrue longitudinally over a minimum of one-year follow-up.  
157 Additionally, the clinicians who did not seroconvert due to immunosuppression, did not  
158 have measures of T-cell mediated immunity that could still be providing protective  
159 immune responses (13). Lastly, this work does not address presence of neutralizing  
160 antibodies or antibody responses to other non-mRNA vaccines.

161         SARS-CoV-2 IgG titers against the spike protein are available to clinical  
162 laboratories but have not been studied as surrogate markers for immune protection.  
163 Measure of quantitative SARS-CoV-2 spike protein IgG responses plotted over time

164 following immunization in specific cohorts, while tracking clinical correlates, may help to  
165 identify individuals who have titer levels that become non-protective. This strategy may  
166 serve as the basis to have them studied with other correlates of immune protection (e.g.  
167 T-cells) (13) or be candidates for additional doses. To achieve these goals (12, 13), only  
168 serological assays targeting the spike protein and with demonstrated sensitivity and  
169 specificity, such as the one used for our study, ought to be utilized. Ongoing studies  
170 such as ours, can potentially unveil differences in IgG responses between vaccine  
171 brands (as observed in this interim report) that may be relevant clinically or for  
172 manufacturing purposes (e.g., choice of antigen amount).

173



174 **ACKNOWLEDGMENTS**

175 We thank the clinicians who have volunteered and are participating in our study, Palo  
176 Alto Medical Foundation/Bay Area Medical Foundation/Sutter Health for their  
177 administrative support, and Palo Alto Medical Foundation donors for their financial  
178 support.

179

180

181

182

183

184

185

186

187

188 **REFERENCES**

- 189 1. Dooling K, Marin M, Wallace M, McClung N, Chamberland M, Lee GM, Talbot HK,  
190 Romero JR, Bell BP, Oliver SE. 2021. The Advisory Committee on Immunization Practices'  
191 Updated Interim Recommendation for Allocation of COVID-19 Vaccine - United States,  
192 December 2020. *MMWR Morb Mortal Wkly Rep* 69:1657-1660.
- 193 2. Rubin EJ, Baden LR, Morrissey S. 2021. Audio Interview: Advice for Clinicians on Covid-19  
194 Vaccines and Social Restrictions. *N Engl J Med* 384:e77.
- 195 3. Polack FP, Thomas SJ, Kitchin N, Absalon J, Gurtman A, Lockhart S, Perez JL, Perez Marc  
196 G, Moreira ED, Zerbini C, Bailey R, Swanson KA, Roychoudhury S, Koury K, Li P, Kalina  
197 WV, Cooper D, Frenck RW, Jr., Hammitt LL, Tureci O, Nell H, Schaefer A, Unal S, Tresnan  
198 DB, Mather S, Dormitzer PR, Sahin U, Jansen KU, Gruber WC, Group CCT. 2020. Safety  
199 and Efficacy of the BNT162b2 mRNA Covid-19 Vaccine. *N Engl J Med* 383:2603-2615.
- 200 4. Baden LR, El Sahly HM, Essink B, Kotloff K, Frey S, Novak R, Diemert D, Spector SA,  
201 Roupheal N, Creech CB, McGettigan J, Khetan S, Segall N, Solis J, Brosz A, Fierro C,  
202 Schwartz H, Neuzil K, Corey L, Gilbert P, Janes H, Follmann D, Marovich M, Mascola J,  
203 Polakowski L, Ledgerwood J, Graham BS, Bennett H, Pajon R, Knightly C, Leav B, Deng W,  
204 Zhou H, Han S, Ivarsson M, Miller J, Zaks T, Group CS. 2021. Efficacy and Safety of the  
205 mRNA-1273 SARS-CoV-2 Vaccine. *N Engl J Med* 384:403-416.
- 206 5. Folegatti PM, Ewer KJ, Aley PK, Angus B, Becker S, Belij-Rammerstorfer S, Bellamy D, Bibi  
207 S, Bittaye M, Clutterbuck EA, Dold C, Faust SN, Finn A, Flaxman AL, Hallis B, Heath P,  
208 Jenkin D, Lazarus R, Makinson R, Minassian AM, Pollock KM, Ramasamy M, Robinson H,  
209 Snape M, Tarrant R, Voysey M, Green C, Douglas AD, Hill AVS, Lambe T, Gilbert SC,  
210 Pollard AJ, Oxford CVTG. 2020. Safety and immunogenicity of the ChAdOx1 nCoV-19  
211 vaccine against SARS-CoV-2: a preliminary report of a phase 1/2, single-blind,  
212 randomised controlled trial. *Lancet* 396:467-478.
- 213 6. Samanovic MI, Cornelius AR, Wilson JP, Karmacharya T, Gray-Gaillard SL, Allen JR,  
214 Hyman SW, Moritz G, Ali M, Koralov SB, Mulligan MJ, Herati RS. 2021. Poor antigen-  
215 specific responses to the second BNT162b2 mRNA vaccine dose in SARS-CoV-2-  
216 experienced individuals. *medRxiv* doi:10.1101/2021.02.07.21251311.
- 217 7. Stephenson KE, Le Gars M, Sadoff J, de Groot AM, Heerwegh D, Truyers C, Atyeo C, Loos  
218 C, Chandrashekar A, McMahan K, Tostanoski LH, Yu J, Gebre MS, Jacob-Dolan C, Li Z,  
219 Patel S, Peter L, Liu J, Borducchi EN, Nkolola JP, Souza M, Tan CS, Zash R, Julg B,  
220 Nathavitharana RR, Shapiro RL, Azim AA, Alonso CD, Jaegle K, Ansel JL, Kanjilal DG,  
221 Guiney CJ, Bradshaw C, Tyler A, Makoni T, Yanosick KE, Seaman MS, Lauffenburger DA,  
222 Alter G, Struyf F, Douoguih M, Van Hoof J, Schuitemaker H, Barouch DH. 2021.  
223 Immunogenicity of the Ad26.COV2.S Vaccine for COVID-19. *JAMA* 325:1535-1544.
- 224 8. Chu L, McPhee R, Huang W, Bennett H, Pajon R, Nestorova B, Leav B, m RNASG. 2021. A  
225 preliminary report of a randomized controlled phase 2 trial of the safety and  
226 immunogenicity of mRNA-1273 SARS-CoV-2 vaccine. *Vaccine* 39:2791-2799.
- 227 9. BIOMÉRIEUX. 2021. VIDAS® SARS-COV-2 IgG.  
228 <https://www.fda.gov/media/140937/download>. Accessed

- 229 10. Deepak P, Kim W, Paley MA, Yang M, Carvidi AB, El-Qunni AA, Haile A, Huang K, Kinnett  
230 B, Liebeskind MJ, Liu Z, McMorrow LE, Paez D, Perantie DC, Schriefer RE, Sides SE, Thapa  
231 M, Gergely M, Abushamma S, Klebert M, Mitchell L, Nix D, Graf J, Taylor KE, Chahin S,  
232 Ciorba MA, Katz P, Matloubian M, O'Halloran JA, Presti RM, Wu GF, Whelan SPJ, Buchser  
233 WJ, Gensler LS, Nakamura MC, Ellebedy AH, Kim AHJ. 2021. Glucocorticoids and B Cell  
234 Depleting Agents Substantially Impair Immunogenicity of mRNA Vaccines to SARS-CoV-  
235 2. medRxiv doi:10.1101/2021.04.05.21254656.
- 236 11. Mehling M, Johnson TA, Antel J, Kappos L, Bar-Or A. 2011. Clinical immunology of the  
237 sphingosine 1-phosphate receptor modulator fingolimod (FTY720) in multiple sclerosis.  
238 *Neurology* 76:S20-7.
- 239 12. Cromer D, Juno JA, Khoury D, Reynaldi A, Wheatley AK, Kent SJ, Davenport MP. 2021.  
240 Prospects for durable immune control of SARS-CoV-2 and prevention of reinfection. *Nat*  
241 *Rev Immunol* doi:10.1038/s41577-021-00550-x.
- 242 13. Sette A, Crotty S. 2021. Adaptive immunity to SARS-CoV-2 and COVID-19. *Cell* 184:861-  
243 880.

244

245

246

247

248

249

250

251

252

**Table 1: Demographics in 611 participants who completed baseline assessment and serum**

| <b>Gender</b>                  | <b>N</b>   | <b>%</b> |
|--------------------------------|------------|----------|
| Female                         | 410        | 67.1%    |
| Male                           | 201        | 32.9%    |
| <b>Age mean and categories</b> | 47.4 (9.7) |          |
| 28-39                          | 140        | 22.9%    |
| 40-49                          | 229        | 37.5%    |
| 50-59                          | 161        | 26.4%    |
| 60-76                          | 81         | 13.3%    |

253

254

255 **Figure 1 legend.** Levels of SARS CoV-2 IgG against the spike protein's receptor-binding  
256 domain by vaccine brand (BNT162b2, mRNA-1273) and over time following first and  
257 second doses.

258

259

260

261

262

263

264

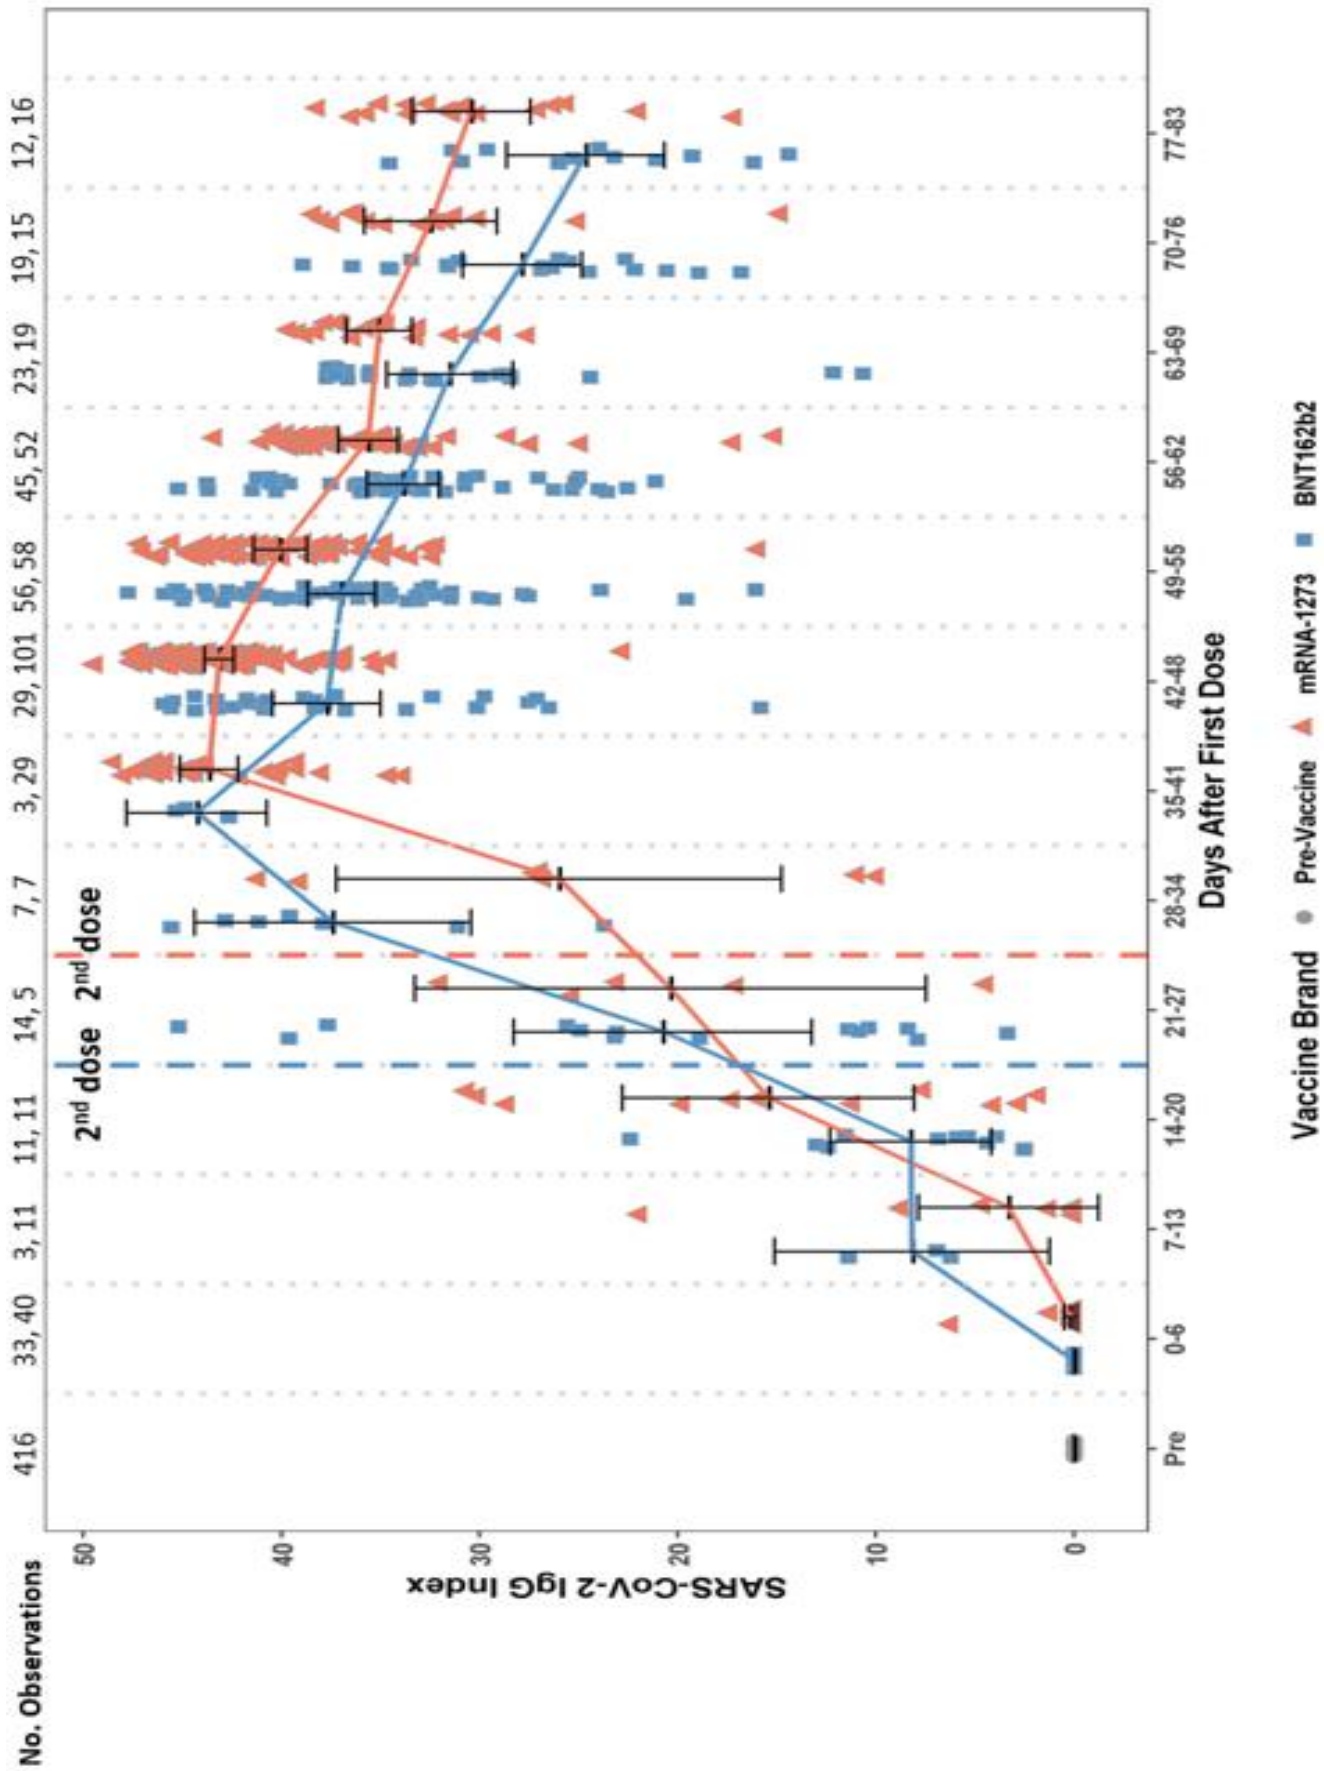

Source: http://biorxiv.org/content/10.1101/2021.06.18.449086v1.full.pdf
